# Supplementary material
Source: Research Square preprint supplement (doi:10.21203/rs.3.rs-9595056/v1)
Supplement: Supplementary file 1 [file ce8e3c626938fef91ea6a2b9.docx]

**Supplementary Materials**

**Streamlined stable CHO cell line development using droplet microfluidics with monoclonality assurance**

Kumar Vishven Naveen1, Akanksha Tyagi1, Omnia Mohammed Hamid Ibrahium2, Rainer EAW Fischer1,and Raluca Ostafe1,2*

1Purdue Institute of Inflammation, Immunology and Infectious Disease, Purdue University, West Lafayette, 47907, United States

2Department of Biological Sciences, Purdue University, West Lafayette, IN 47907, United States

* Corresponding author- rostafe@purdue.edu

**Table S1**. List of donor/acceptor probe pairs evaluated for FRET-based total IgG detection, including full-length antibodies (anti-Fc and anti-F(ab')₂), F(ab')₂ fragments, and Protein G- or Protein L-based binding reagents.

| **Ref.** | | **Species** | **Antigen** | **Fluorophore** | **Ab Type** | **Degree of Labeling (DOL)** | **Supplier** | **Product #** |
| --- | --- | --- | --- | --- | --- | --- | --- | --- |
| Figure 3a | Donor | Goat | Mouse IgG, F(ab')2 | Alexa Fluor® 488 | IgG, Polyclonal | 1.648 | Jackson Immuno Research | 115-545-006  lot 174859 |
| Acceptor | Goat | Mouse IgG, Fcγ | Alexa Fluor® 594 | IgG, Polyclonal | 1.228 | Jackson Immuno Research | 115-585-008  lot 174840 |
| Figure 3b | Donor | Goat | Mouse IgG, F(ab')2 | DyLight® 488 | F(ab')2, Polyclonal | 1.305 | Abcam | ab98757 |
| Acceptor | Goat | Mouse IgG, Fc | DyLight® 594 | IgG, Polyclonal | 3.055 | Abcam | ab97017 |
| Figure 3c | Donor | *E. coli* | IgG, Fc | iFluor® 488 succinimidyl ester (staining in house) | Protein G | 2.42 | GenScript | Z02007 |
| Acceptor | *E. coli* | IgG, κ (kappa) light chains | iFluor® 594 succinimidyl ester (staining in house) | Protein L | 0.987 | Pierce | 21189 |
| Figure 3d | Donor | Goat | Mouse IgG, Fcγ | Alexa Fluor® 488 | F(ab')2, Polyclonal | 1.676 | Jackson Immuno Research | 115-546-008  lot 169468 |
| Acceptor | Goat | Mouse IgG, F(ab')2 | Alexa Fluor® 594 | F(ab')2, Polyclonal | 0.642 | Jackson Immuno Research | 115-586-006  lot 169591 |

**Figure S1**. Flow cytometry analysis of CHO-S cell populations before and after picodroplet sorting. (a) CellTrace™ Far Red (CTFR)-stained CHO-S cells transiently expressing gevokizumab, used to define the producer population. (b) Unstained non-expressing CHO-S cells, used to define the non-producer population. (c) Artificial mixed library generated at a defined 5%:95% ratio of CTFR-positive to unstained cells prior to sorting. (d) Post-sorting analysis showing enrichment of CTFR-positive antibody-secreting cells from the mixed population.


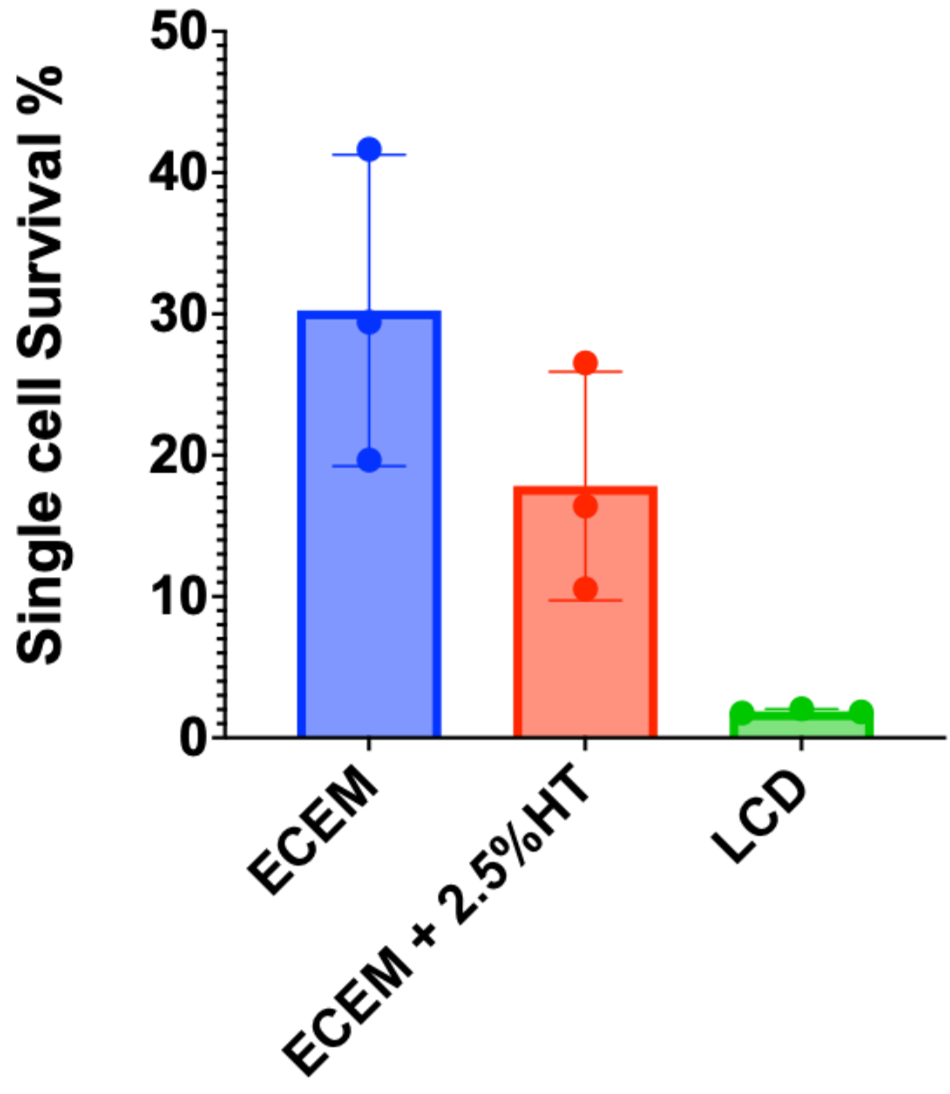


**Figure S2.** Single-cell outgrowth of ExpiCHO-S cells in 96-well plates (deposited using a FACSAria™ Fusion sorter) containing 200 µL of different media, assessed on Day 14. Error bars represent the standard deviation (n=3). ECEM; ExpiCHO Expression Medium, HT; HT supplement, LCD; Low Cell Density media

**Figure S3**. Kill-curve analysis of ExpiCHO-S cells treated with Zeocin (0–500 µg/mL), with cell viability measured at specified time points. Viability was determined using Trypan blue. C; control


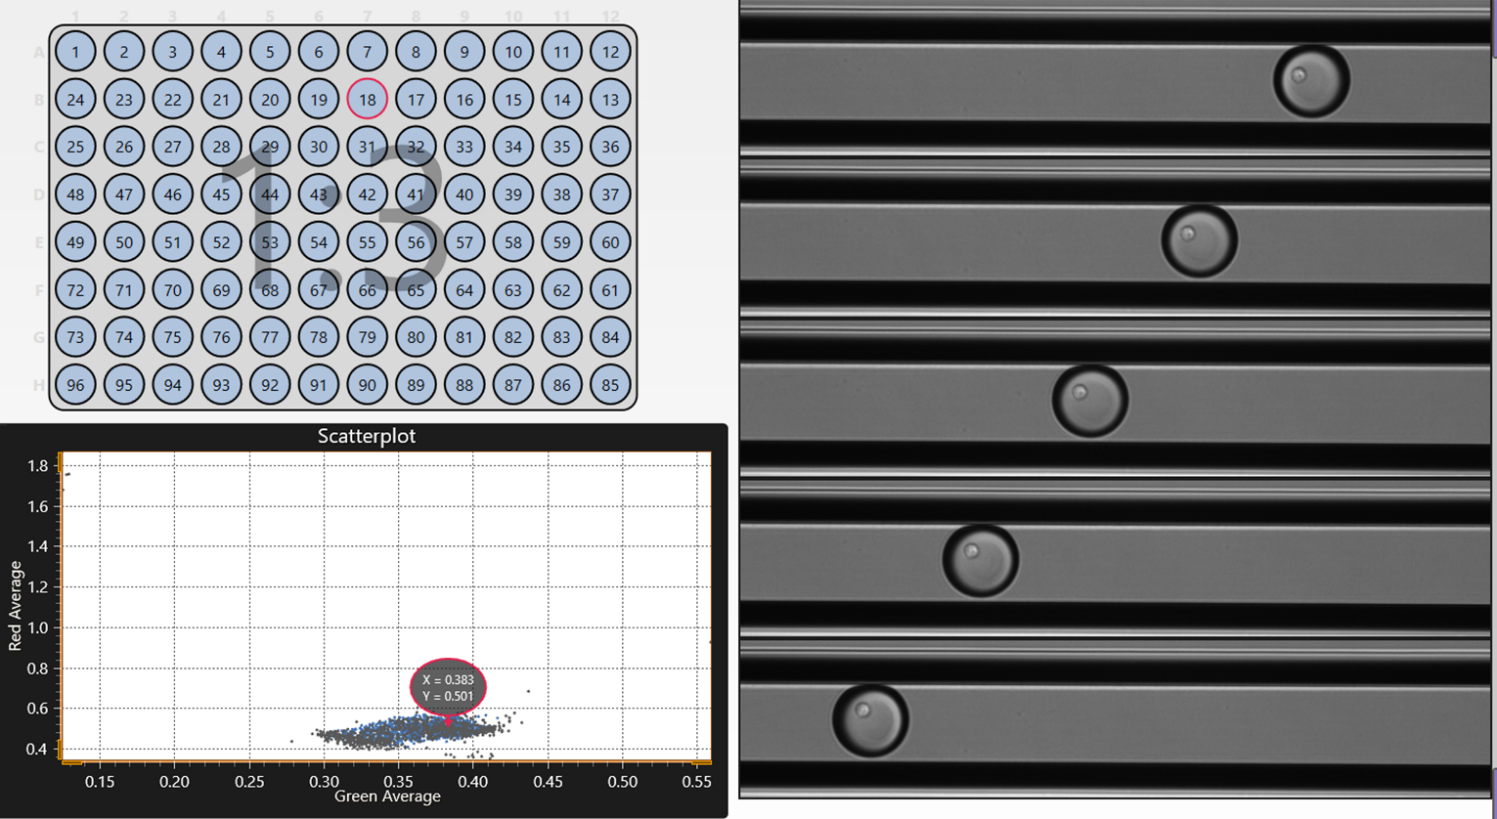


**Figure S4.** Representative images of picodroplets prior to dispensing. Five sequential images of each picodroplet were recorded immediately before dispensing into a well of a microtiter plate. Shown here is picodroplet from sorting event 1, sample 18 on plate 3 (well 3B7), containing a single cell. The accompanying scatterplot indicates the location of this picodroplet.


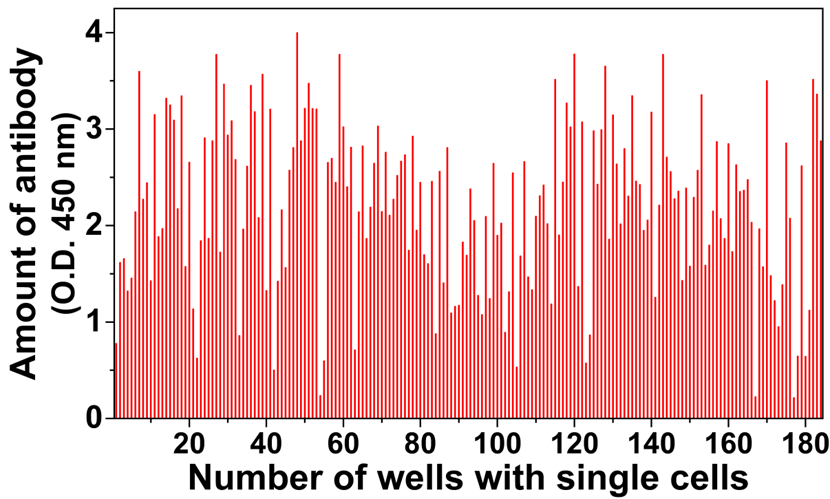


**Figure S5.** ELISA-based analysis of antibody productivity in individual clones verified following single-cell sorting.

**Figure S6**. Map of Gevokizumab in pTRIOZ-mIgG1e2 vector.
